# Supplementary material for: Assessment of Employee Susceptibility to Phishing Attacks at US Health Care Institutions
Source: PubMed Central journal article supplement (PMC6484661; doi:10.1001/jamanetworkopen.2019.0393), 2019-03-08
Supplement: jamanetwopen-2-e190393-s001.pdf [file jamanetwopen-2-e190393-s001.pdf]

## Supplementary Online Content

Gordon WJ, Wright A, Aiyagari R, et al. Assessment of employee susceptibility to phishing attacks at US health care institutions. *JAMA Netw Open*. 2019;2(3):e190393. doi:10.1001/jamanetworkopen.2019.0393

**eTable 1.** Examples of Phishing Emails (Identifying Information Replaced by [Institution])

**eTable 2.** Hospital Characteristics

**eTable 3.** US Census Regions and Divisions

This supplementary material has been provided by the authors to give readers additional information about their work.

**eTable 1.** Examples of Phishing Emails (Identifying Information Replaced by [Institution]). The first example is a simulated phishing email sent as part of a campaign by one of the collaborating sites. The second example is an actual phishing email received by one of our collaborating sites.

| Email Type          | Phishing Email Text                                                                                                                                                                                                                                                                                                                                                                                                                                                                                                                                       |
|---------------------|-----------------------------------------------------------------------------------------------------------------------------------------------------------------------------------------------------------------------------------------------------------------------------------------------------------------------------------------------------------------------------------------------------------------------------------------------------------------------------------------------------------------------------------------------------------|
| Phishing Simulation | <p>From: [Institution] Support &lt;[institution]-webmail@gmail.com&gt;</p> <p>Subject: Email Quota Exceeded</p> <p>Attention [Institution] User:</p> <p>Your [Institution].edu inbox has exceeded the email storage limit currently permitted under Hospital guidelines. You are running out of storage and may not be able to send or receive email your mailbox has been upgraded.</p> <p>Please click [here] to upgrade your mailbox.</p> <p>Thanks,</p> <p>[Institution] Assistant System Administrator</p>                                           |
| Real Phishing Email | <p>From: support.team@[institution].org</p> <p>Subject: Unauthorized Access</p> <p>For your [institution].org mailbox account security we recommend that you <b>CLICK HERE</b> and verify your [institution].org account and always exit your [institution].org account using the logout button in the upper right corner instead of just closing the tab of your browser.</p> <p>This serves as an additional security measure to prevent unauthorized access to your account.</p> <p>[Institution].org Support HelpDesk ©2017. All rights reserved.</p> |

**eTable 2.** Hospital Characteristics. Data limited to preserve the identity of individual institutions.

| Institution | Geographic Reach | For Profit / Non Profit Status | Annual Revenue |
|-------------|------------------|--------------------------------|----------------|
| A           | Multi-state      | Non-Profit                     | > \$10 billion |
| B           | Multi-state      | Non-Profit                     | > \$10 billion |
| C           | Single state     | Non-Profit                     | \$1-10 billion |
| D           | Multi-state      | Non-Profit                     | \$1-10 billion |
| E           | Single state     | Non-Profit                     | \$1-10 billion |
| F           | Multi state      | Non-Profit                     | \$1-10 billion |

**eTable 3.** US Census Regions and Divisions. Listed are the US census regions represented by the institutions included in this study. Some institutions span more than one census region, therefore the totals are greater than 6.

| US Census Region | Count |
|------------------|-------|
| Northeast        | 2     |
| South            | 2     |
| Midwest          | 2     |
| West             | 2     |
